# Supplementary material for: Providing a conceptual framework for HIV prevention cascades and assessing feasibility of empirical measurement with data from east Zimbabwe: a case study
Source: PubMed Central journal article supplement (PMC4935672; doi:10.1016/s2352-3018(16)30039-x), 2016-06-27
Supplement: mmc1.pdf [file mmc1.pdf]

# THE LANCET HIV

## Supplementary appendix

This appendix formed part of the original submission and has been peer reviewed. We post it as supplied by the authors.

Supplement to: Garnett GP, Hallett TB, Takaruza A, et al. Providing a conceptual framework for HIV prevention cascades and assessing feasibility of empirical measurement with data from east Zimbabwe: a case study. *Lancet HIV* 2016; **3**: 297–306.

# Cascades for HIV prevention: conceptual framework and feasibility of empirical measurement

*Geoffrey P Garnett, Timothy B Hallett, Albert Takaruzza, James Hargreaves, Rebecca Rhead, Mitchel Warren, Constance Nyamukapa, Simon Gregson*

## Supplementary Material

### HIV incidence estimates

HIV incidence rates were calculated for the eight study sites in Manicaland, eastern Zimbabwe, for which HIV prevention cascades were computed in the main paper and using the same individual eligibility criteria – i.e. adults aged 15-54 years who were resident in and had stayed in a household in the study areas for at least four nights in the month before interview. For the two most recent inter-survey periods (2006-2011 (R4-R5) and 2009-2013 (R5-R6)), HIV incidence was measured in members of the cohort who were uninfected at baseline. For seroconversions between rounds, the date of seroconversion was taken to have occurred midway between the date of baseline interview and the date of follow-up interview. Follow-up time was censored at the date of seroconversion. HIV incidence rates were calculated overall, for men and women who had started sexual activity, and for selected socio-demographic sub-groups. Numbers of seroconversions and person-years of exposure for each period and population group are given in table A1.

HIV incidence in the general population aged 15-54 years in the three-year periods prior to rounds five (R5) and six (R6) of the Manicaland GPCS was 0.80% pa (95% CI, 0.64%-1.00%) and 0.67% (0.53%-0.84%) pa, respectively. Amongst the sexually-experienced population, these rates increase to 0.91% (0.73%-1.13%) and 0.75% (0.60%-0.95%) (table 1A). In both cases – and for each sex – non-statistically-significant reductions in HIV incidence were observed between 2006-2011 and 2009-2013.

Table A1 shows the HIV incidence rates for each period by sex and socio-demographic sub-group. These rates are used to produce the estimates of reductions in HIV incidence achieved through implementation of HIV prevention tools and, for HIV testing, through associated reductions in sexual risk behaviour.

### HIV testing and counselling and sexual behaviour change

Figure A1 summarises the data from the last two rounds of the Manicaland GPCS on reported changes in sexual behaviour – reductions in numbers of sexual partners and increases in condom use – following receipt of a negative HIV test result.

In most cases, no change in behaviour was reported and, in many of these cases (especially for women), this is likely to be because the respondent was already abstaining from sexual intercourse or keeping to one regular sexual partner. However, a reasonable minority of men and a small number of women in each round reported a reduction in numbers of sexual partners and/or increased condom use. For example, 30.4% and 12.8% of men in 2012-2013 reported a reduction in number of sexual partners and an increase in condom use, respectively. Some of those who reported a reduction in numbers of sexual partners also reported a *reduction* in condom use; possibly because they were now abstaining or keeping to a single regular partner.

### **HIV prevention cascades for socio-demographic sub-groups**

Comparing HIV prevention cascades between population sub-groups may provide useful information for targeting prevention strategies to those at greatest risk or to those for whom they may be most acceptable.

Tables A2a to A2b show comparisons of HIV prevention cascades for VMMC by age-group, marital status, location (type of study site), and whether or not the respondent had casual sexual partners in the three years before the survey visit. Empirical estimates of actual HIV incidence rates are shown for the same population sub-groups. In 2012-2013, known availability of VMMC services was lowest in widowed men (83.3%), the group that also had the highest rate of HIV incidence (7.2%); however, there were only 28 men in this group (table A2b). Lost opportunities to prevent new HIV infections due to lack of known availability of VMMC services varied from 58.7% in small towns to 71.2% in rural villages and 73.2% in agricultural estates. When services were known to be available, uptake of VMMC was generally low; the highest uptake being seen in divorced and separated men (17.8%, 42/236) – a group with high HIV incidence (2.7%) – and in men aged 45-54 years (16.0%, 43/269; HIV incidence 0.63%).

Tables A2c to A2f show HIV prevention cascades for HTC as an intervention to reduce numbers of sexual partners with comparisons for the same socio-demographic sub-groups. In 2012-2013, for men, lack of knowledge of HTC availability was relatively high in 15-19 year-olds (163/1000) compared to other population sub-groups. Lack of uptake of HTC remained particularly high in divorced men for whom HIV incidence was high (3.0%). Lack of partner reduction was common across the board but greatest amongst married men – possibly because these men were less likely to have casual partners prior to having an HIV test.

For women, lack of knowledge of local availability of HTC had become a minor factor limiting the impact on HTC in preventing HIV infections in those living in the agricultural estates and rural villages but was still a factor for more than 10% of women living in towns – perhaps due to greater population mobility. Lack of uptake of HTC varied by age-group and marital status (highest outside peak childbearing ages and in single and widowed women). Uptake was fairly high in divorced and separated women for whom the greatest numbers of infections were prevented per 1000 at risk (40/1000). Infections prevented per 1000 at risk were also relatively high in single women (32/1000), a group with high HIV incidence (1.6%). Again, only small numbers of HIV-uninfected women reported reducing their number of sexual partners following HTC.

Tables A2g to A2j show HIV prevention cascades for HTC as an intervention to increase condom use again for the same socio-demographic sub-groups. Although this was not the case for men overall, for some high-risk population sub-groups (e.g. divorced and widowed men), HIV infections prevented per 1000 at risk were greater for condom promotion than for partner reduction, possibly due to high levels of casual partners. Also, for women, increased condom use following HTC had a slightly greater impact in preventing HIV (24/1000 in round 6) than reductions in numbers of sexual partners (13/1000). Increased condom use following HTC was slightly higher in divorced and separated women than in other population sub-groups.

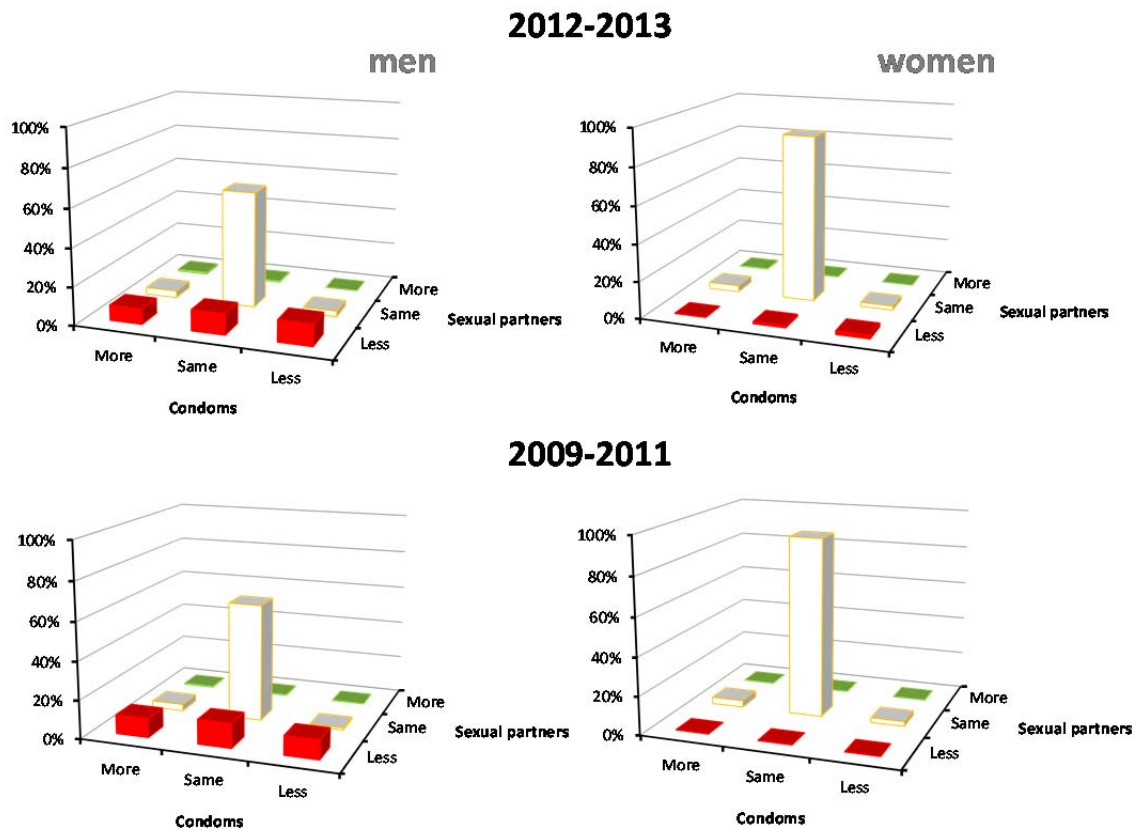

**Figure A1:** Changes in numbers of sexual partners and condom use reported by adults aged 15-54 years in Manicaland, Zimbabwe, following receipt of a negative HIV testing and counselling result in the past three years. (A) Men, 2012-2103. (B) Women, 2012-2013. (C) Men, 2009-011. (D) Women 15-54, 2009-2011.

| Characteristic at baseline        | 2009-2013 |                    | 2006-2011 |                    |          |                    |
|-----------------------------------|-----------|--------------------|-----------|--------------------|----------|--------------------|
|                                   | 8 sites   |                    | 8 sites   |                    | 12 sites |                    |
|                                   | SC/PY     | HIV incidence (CI) | SC/PY     | HIV incidence (CI) | SC/PY    | HIV incidence (CI) |
| <b>Males, aged 15-54 years</b>    |           |                    |           |                    |          |                    |
| All                               | 20/2968   | 0.67 (0.43-1.04)   | 26/2752   | 0.94 (0.64-1.39)   | 28/3854  | 0.73 (0.50-1.05)   |
| Age-group (years)                 |           |                    |           |                    |          |                    |
| 15-19                             | 1/357     | 0.28 (0.04-1.97)   | 0/265     | 0.00               | 0/388    | 0.00               |
| 20-24                             | 0/420     | 0.00               | 3/463     | 0.64 (0.21-2.01)   | 3/605    | 0.50 (0.16-1.54)   |
| 25-34                             | 9/1006    | 0.89 (0.47-1.72)   | 13/949    | 1.37 (0.80-2.36)   | 14/1327  | 1.05 (0.62-1.78)   |
| 35-44                             | 7/708     | 0.99 (0.47-2.07)   | 7/575     | 1.22 (0.58-2.55)   | 8/824    | 0.97 (0.49-1.94)   |
| 45-54                             | 3/476     | 0.63 (0.20-1.95)   | 3/500     | 0.60 (0.19-1.86)   | 3/709    | 0.42 (0.14-1.31)   |
| Marital status                    |           |                    |           |                    |          |                    |
| Single                            | 1/777     | 0.13 (0.02-0.91)   | 6/768     | 0.78 (0.35-1.74)   | 6/1044   | 0.57 (0.26-1.28)   |
| Married                           | 15/2086   | 0.72 (0.43-1.19)   | 18/1880   | 0.96 (0.60-1.52)   | 20/2675  | 0.75 (0.48-1.16)   |
| Divorced/separated                | 2/76      | 2.62 (0.65-10.5)   | 2/83      | 2.41 (0.60-9.62)   | 2/107    | 1.87 (0.47-0.75)   |
| Widowed                           | 2/28      | 7.22 (1.80-28.9)   | 0/21      | 0.00               | 0/29     | 0.00               |
| Location                          |           |                    |           |                    |          |                    |
| Towns                             | 4/832     | 0.48 (0.18-1.28)   | 9/607     | 1.48 (0.77-2.85)   | 9/607    | 1.48 (0.77-2.85)   |
| Estates                           | 7/696     | 1.13 (0.48-2.11)   | 7/712     | 0.98 (0.47-2.06)   | 9/1347   | 0.67 (0.35-1.28)   |
| Small villages                    | 9/1439    | 0.63 (0.33-1.20)   | 10/1433   | 0.70 (0.38-1.30)   | 10/1900  | 0.53 (0.28-0.98)   |
| Migration <sup>b</sup>            |           |                    |           |                    |          |                    |
| Long-term residents               | 17/2814   | 0.60 (0.40-0.97)   | 21/2367   | 0.89 (0.58-1.36)   | 23/3377  | 0.68 (0.45-1.02)   |
| Recent in-migrants                | 3/153     | 1.96 (0.63-6.07)   | 5/385     | 1.30 (0.54-3.12)   | 5/477    | 1.05 (0.44-2.52)   |
| <b>Females, aged 15-54 years</b>  |           |                    |           |                    |          |                    |
| All                               | 52/6620   | 0.79 (0.60-1.03)   | 51/5735   | 0.89 (0.68-1.17)   | 61/8308  | 0.73 (0.57-0.94)   |
| Age-group (years)                 |           |                    |           |                    |          |                    |
| 15-19                             | 1/380     | 0.26 (0.04-1.87)   | 3/315     | 0.95 (0.31-2.95)   | 3/493    | 0.61 (0.20-1.89)   |
| 20-24                             | 17/908    | 1.87 (1.16-3.01)   | 8/868     | 0.92 (0.46-1.84)   | 9/1200   | 0.75 (0.39-1.44)   |
| 25-34                             | 16/2070   | 0.77 (0.47-1.26)   | 26/1638   | 1.59 (1.08-2.33)   | 32/2362  | 1.36 (0.96-1.92)   |
| 35-44                             | 13/1611   | 0.81 (0.47-1.39)   | 9/1529    | 0.59 (0.31-1.13)   | 11/2167  | 0.51 (0.28-0.92)   |
| 45-54                             | 5/1651    | 0.30 (0.13-0.73)   | 5/1384    | 0.36 (0.15-0.87)   | 6/2086   | 0.29 (0.13-0.64)   |
| Marital status                    |           |                    |           |                    |          |                    |
| Single                            | 4/257     | 1.56 (0.58-4.12)   | 8/412     | 1.94 (0.97-3.89)   | 10/571   | 1.75 (0.94-3.25)   |
| Married                           | 41/5333   | 0.77 (0.57-1.04)   | 30/4278   | 0.70 (0.49-1.00)   | 33/6252  | 0.53 (0.38-0.74)   |
| Divorced/separated                | 3/376     | 0.81 (0.26-2.52)   | 9/403     | 2.24 (1.16-4.30)   | 11/572   | 1.92 (1.06-3.47)   |
| Widowed                           | 4/661     | 0.60 (0.23-1.61)   | 4/643     | 0.62 (0.23-1.66)   | 7/912    | 0.77 (0.37-1.61)   |
| Location                          |           |                    |           |                    |          |                    |
| Towns                             | 12/1412   | 0.85 (0.48-1.50)   | 18/922    | 1.95 (1.23-3.10)   | 18/922   | 1.95 (1.23-3.10)   |
| Estates                           | 9/1267    | 0.71 (0.37-1.36)   | 9/1090    | 0.83 (0.43-1.59)   | 15/2130  | 0.70 (0.42-1.17)   |
| Small villages                    | 31/3940   | 0.79 (0.55-1.12)   | 24/3723   | 0.64 (0.43-0.96)   | 28/5256  | 0.53 (0.37-0.77)   |
| Migration <sup>b</sup>            |           |                    |           |                    |          |                    |
| Long-term residents               | 43/5987   | 0.72 (0.53-0.97)   | 43/5059   | 0.85 (0.63-1.15)   | 53/7405  | 0.72 (0.55-0.94)   |
| Recent in-migrants                | 9/632     | 1.42 (0.74-2.73)   | 8/675     | 1.18 (0.59-2.37)   | 8/903    | 0.89 (0.44-1.77)   |
| <b>Males and females combined</b> |           |                    |           |                    |          |                    |
| All                               | 72/9587   | 0.75 (0.60-0.95)   | 77/8487   | 0.91 (0.73-1.13)   | 89/12163 | 0.73 (0.59-0.90)   |

<sup>a</sup> Amongst regular household members at baseline who had stayed in the household for at least four nights in the last month before interview

<sup>b</sup> Migration into the area within the previous three years (i.e. prior to baseline)

New infections assumed to take place half-way between the dates of interview at the last round tested negative and the first round tested positive  
CI, 95% confidence interval; PY, person years; SC, seroconverters

**Table A1: HIV incidence amongst sexually-experienced adult (15-54 yrs) residents, Manicaland, Zimbabwe, 2006-2013<sup>a</sup>**

| Population sub-group          |                       | Infections | Infections not prevented due to lack of: |        |           |          | Infections    |           | HIV incidence |        |           |      |
|-------------------------------|-----------------------|------------|------------------------------------------|--------|-----------|----------|---------------|-----------|---------------|--------|-----------|------|
|                               |                       | Potential  | Availability                             | Uptake | Adherence | Efficacy | Not prevented | Prevented | Potential     | Actual | Prevented | PY   |
| All men                       | Cumulative            | 1000       | 971                                      | 982    | 982       | 989      | 989           | 11        | 0.74%         | 0.73%  | 0.01%     | 3547 |
|                               | This stage of cascade | 1000       | 971                                      | 11     | 0         | 7        |               |           |               |        |           |      |
| Sexually-active men           | Cumulative            | 1000       | 964                                      | 973    | 973       | 984      | 984           | 16        | 0.96%         | 0.94%  | 0.02%     | 2752 |
|                               | This stage of cascade | 1000       | 964                                      | 9      | 0         | 11       |               |           |               |        |           |      |
| <b>Age-group</b>              |                       |            |                                          |        |           |          |               |           |               |        |           |      |
| 15-19                         | Cumulative            | 1000       | 967                                      | 983    | 983       | 990      | 990           | 10        | 0.00%         | 0.00%  | 0.00%     | 265  |
|                               | This stage of cascade | 1000       | 967                                      | 16     | 0         | 7        |               |           |               |        |           |      |
| 20-24                         | Cumulative            | 1000       | 972                                      | 979    | 979       | 987      | 987           | 13        | 0.65%         | 0.64%  | 0.01%     | 463  |
|                               | This stage of cascade | 1000       | 972                                      | 7      | 0         | 8        |               |           |               |        |           |      |
| 25-34                         | Cumulative            | 1000       | 969                                      | 975    | 975       | 985      | 985           | 15        | 1.39%         | 1.37%  | 0.02%     | 949  |
|                               | This stage of cascade | 1000       | 969                                      | 6      | 0         | 10       |               |           |               |        |           |      |
| 35-44                         | Cumulative            | 1000       | 958                                      | 975    | 975       | 985      | 985           | 15        | 1.24%         | 1.22%  | 0.02%     | 575  |
|                               | This stage of cascade | 1000       | 958                                      | 17     | 0         | 10       |               |           |               |        |           |      |
| 45-54                         | Cumulative            | 1000       | 950                                      | 954    | 954       | 973      | 973           | 27        | 0.62%         | 0.60%  | 0.02%     | 500  |
|                               | This stage of cascade | 1000       | 950                                      | 4      | 0         | 19       |               |           |               |        |           |      |
| <b>Marital status</b>         |                       |            |                                          |        |           |          |               |           |               |        |           |      |
| Single                        | Cumulative            | 1000       | 972                                      | 979    | 979       | 987      | 987           | 13        | 0.79%         | 0.78%  | 0.01%     | 768  |
|                               | This stage of cascade | 1000       | 972                                      | 7      | 0         | 8        |               |           |               |        |           |      |
| Married                       | Cumulative            | 1000       | 969                                      | 975    | 975       | 985      | 985           | 15        | 0.98%         | 0.96%  | 0.02%     | 1880 |
|                               | This stage of cascade | 1000       | 969                                      | 6      | 0         | 10       |               |           |               |        |           |      |
| Divorced or separated         | Cumulative            | 1000       | 958                                      | 975    | 975       | 985      | 985           | 15        | 2.52%         | 2.41%  | 0.11%     | 83   |
|                               | This stage of cascade | 1000       | 958                                      | 17     | 0         | 10       |               |           |               |        |           |      |
| Widowed                       | Cumulative            | 1000       | 950                                      | 954    | 954       | 973      | 973           | 27        | 0.00%         | 0.00%  | 0.00%     | 21   |
|                               | This stage of cascade | 1000       | 950                                      | 4      | 0         | 19       |               |           |               |        |           |      |
| <b>Location</b>               |                       |            |                                          |        |           |          |               |           |               |        |           |      |
| Towns                         | Cumulative            | 1000       | 945                                      | 972    | 972       | 983      | 983           | 17        | 1.51%         | 1.48%  | 0.03%     | 607  |
|                               | This stage of cascade | 1000       | 945                                      | 27     | 0         | 11       |               |           |               |        |           |      |
| Estates                       | Cumulative            | 1000       | 962                                      | 962    | 962       | 977      | 977           | 23        | 1.00%         | 0.98%  | 0.02%     | 712  |
|                               | This stage of cascade | 1000       | 962                                      | 0      | 0         | 15       |               |           |               |        |           |      |
| Small villages                | Cumulative            | 1000       | 974                                      | 978    | 978       | 987      | 987           | 13        | 0.71%         | 0.70%  | 0.01%     | 1433 |
|                               | This stage of cascade | 1000       | 974                                      | 4      | 0         | 9        |               |           |               |        |           |      |
| <b>Casual sexual partners</b> |                       |            |                                          |        |           |          |               |           |               |        |           |      |
| ≥1 in last 3 years            | Cumulative            | 1000       | 964                                      | 973    | 973       | 984      | 984           | 16        | 1.47%         | 1.45%  | 0.02%     | 689  |
|                               | This stage of cascade | 1000       | 964                                      | 9      | 0         | 11       |               |           |               |        |           |      |
| None in last 3 years          | Cumulative            | 1000       | 963                                      | 972    | 972       | 983      | 983           | 17        | 0.79%         | 0.78%  | 0.01%     | 2060 |
|                               | This stage of cascade | 1000       | 963                                      | 9      | 0         | 11       |               |           |               |        |           |      |

**Table A2a: HIV prevention cascades for VMMC by population sub-group, Manicaland, Zimbabwe, 2009-2011**

| Population sub-group  |                       | Infections | Infections not prevented due to lack of: |        |           |          | Infections    |           | HIV incidence |        |           |      |
|-----------------------|-----------------------|------------|------------------------------------------|--------|-----------|----------|---------------|-----------|---------------|--------|-----------|------|
|                       |                       | Potential  | Availability                             | Uptake | Adherence | Efficacy | Not prevented | Prevented | Potential     | Actual | Prevented | PY   |
| All men               | Cumulative            | 1000       | 682                                      | 959    | 959       | 976      | 976           | 24        | 0.55%         | 0.53%  | 0.01%     | 3762 |
|                       | This stage of cascade | 1000       | 682                                      | 277    | 0         | 17       |               |           |               |        |           |      |
| Sexually-active men   | Cumulative            | 1000       | 684                                      | 962    | 962       | 977      | 977           | 23        | 0.69%         | 0.67%  | 0.02%     | 2968 |
|                       | This stage of cascade | 1000       | 684                                      | 278    | 0         | 15       |               |           |               |        |           |      |
| Age-group             |                       |            |                                          |        |           |          |               |           |               |        |           |      |
| 15-19                 | Cumulative            | 1000       | 697                                      | 955    | 955       | 973      | 973           | 27        | 0.29%         | 0.28%  | 0.01%     | 357  |
|                       | This stage of cascade | 1000       | 697                                      | 258    | 0         | 18       |               |           |               |        |           |      |
| 20-24                 | Cumulative            | 1000       | 671                                      | 988    | 988       | 993      | 993           | 7         | 0.00%         | 0.00%  | 0.00%     | 420  |
|                       | This stage of cascade | 1000       | 671                                      | 317    | 0         | 5        |               |           |               |        |           |      |
| 25-34                 | Cumulative            | 1000       | 679                                      | 961    | 961       | 977      | 977           | 23        | 0.91%         | 0.89%  | 0.02%     | 1006 |
|                       | This stage of cascade | 1000       | 679                                      | 282    | 0         | 16       |               |           |               |        |           |      |
| 35-44                 | Cumulative            | 1000       | 672                                      | 951    | 951       | 970      | 970           | 30        | 1.02%         | 0.99%  | 0.03%     | 708  |
|                       | This stage of cascade | 1000       | 672                                      | 279    | 0         | 19       |               |           |               |        |           |      |
| 45-54                 | Cumulative            | 1000       | 731                                      | 957    | 957       | 974      | 974           | 26        | 0.65%         | 0.63%  | 0.02%     | 476  |
|                       | This stage of cascade | 1000       | 731                                      | 226    | 0         | 17       |               |           |               |        |           |      |
| Marital status        |                       |            |                                          |        |           |          |               |           |               |        |           |      |
| Single                | Cumulative            | 1000       | 645                                      | 967    | 967       | 980      | 980           | 20        | 0.13%         | 0.13%  | 0.00%     | 777  |
|                       | This stage of cascade | 1000       | 645                                      | 322    | 0         | 13       |               |           |               |        |           |      |
| Married               | Cumulative            | 1000       | 689                                      | 960    | 960       | 976      | 976           | 24        | 0.74%         | 0.72%  | 0.02%     | 2086 |
|                       | This stage of cascade | 1000       | 689                                      | 271    | 0         | 16       |               |           |               |        |           |      |
| Divorced or separated | Cumulative            | 1000       | 764                                      | 958    | 958       | 975      | 975           | 25        | 2.69%         | 2.62%  | 0.07%     | 76   |
|                       | This stage of cascade | 1000       | 764                                      | 194    | 0         | 17       |               |           |               |        |           |      |
| Widowed               | Cumulative            | 1000       | 833                                      | 1000   | 1000      | 1000     | 1000          | 0         | 7.22%         | 7.22%  | 0.00%     | 28   |
|                       | This stage of cascade | 1000       | 833                                      | 167    | 0         | 0        |               |           |               |        |           |      |
| Location              |                       |            |                                          |        |           |          |               |           |               |        |           |      |
| Towns                 | Cumulative            | 1000       | 587                                      | 955    | 955       | 973      | 973           | 27        | 0.49%         | 0.48%  | 0.01%     | 832  |
|                       | This stage of cascade | 1000       | 587                                      | 368    | 0         | 18       |               |           |               |        |           |      |
| Estates               | Cumulative            | 1000       | 732                                      | 971    | 971       | 983      | 983           | 17        | 1.15%         | 1.13%  | 0.02%     | 696  |
|                       | This stage of cascade | 1000       | 732                                      | 239    | 0         | 12       |               |           |               |        |           |      |
| Small villages        | Cumulative            | 1000       | 712                                      | 962    | 962       | 977      | 977           | 23        | 0.65%         | 0.63%  | 0.02%     | 1439 |
|                       | This stage of cascade | 1000       | 712                                      | 250    | 0         | 15       |               |           |               |        |           |      |

**Table A2b: HIV prevention cascades for VMMC by population sub-group, Manicaland, Zimbabwe, 2012-2013**

| Population sub-group   |                       | Infections potential | Infections not prevented due to lack of: |            |                   |          | Infections    |           | HIV incidence |        |           |      |
|------------------------|-----------------------|----------------------|------------------------------------------|------------|-------------------|----------|---------------|-----------|---------------|--------|-----------|------|
|                        |                       |                      | HTC availability                         | HTC uptake | Partner reduction | Efficacy | Not prevented | Prevented | Potential     | Actual | Prevented | PY   |
| All men                | Cumulative            | 1000                 | 361                                      | 793        | 938               | 969      | 969           | 31        | 0.75%         | 0.73%  | 0.02%     | 3547 |
|                        | This stage of cascade | 1000                 | 361                                      | 432        | 145               | 31       |               |           |               |        |           |      |
| Sexually-active men    | Cumulative            | 1000                 | 270                                      | 702        | 902               | 951      | 951           | 49        | 0.99%         | 0.94%  | 0.05%     | 2752 |
|                        | This stage of cascade | 1000                 | 270                                      | 432        | 200               | 49       |               |           |               |        |           |      |
| Age-group              |                       |                      |                                          |            |                   |          |               |           |               |        |           |      |
| 15-19                  | Cumulative            | 1000                 | 328                                      | 853        | 968               | 984      | 984           | 16        | 0.00%         | 0.00%  | 0.00%     | 265  |
|                        | This stage of cascade | 1000                 | 328                                      | 525        | 115               | 16       |               |           |               |        |           |      |
| 20-24                  | Cumulative            | 1000                 | 306                                      | 705        | 910               | 955      | 955           | 45        | 0.67%         | 0.64%  | 0.03%     | 463  |
|                        | This stage of cascade | 1000                 | 306                                      | 399        | 205               | 45       |               |           |               |        |           |      |
| 25-34                  | Cumulative            | 1000                 | 234                                      | 673        | 889               | 945      | 945           | 55        | 1.45%         | 1.37%  | 0.08%     | 949  |
|                        | This stage of cascade | 1000                 | 234                                      | 439        | 216               | 56       |               |           |               |        |           |      |
| 35-44                  | Cumulative            | 1000                 | 260                                      | 702        | 903               | 951      | 951           | 49        | 1.28%         | 1.22%  | 0.06%     | 575  |
|                        | This stage of cascade | 1000                 | 260                                      | 442        | 201               | 48       |               |           |               |        |           |      |
| 45-54                  | Cumulative            | 1000                 | 337                                      | 746        | 914               | 957      | 957           | 43        | 0.63%         | 0.60%  | 0.03%     | 500  |
|                        | This stage of cascade | 1000                 | 337                                      | 409        | 168               | 43       |               |           |               |        |           |      |
| Marital status         |                       |                      |                                          |            |                   |          |               |           |               |        |           |      |
| Single                 | Cumulative            | 1000                 | 311                                      | 740        | 915               | 958      | 958           | 42        | 0.82%         | 0.78%  | 0.04%     | 768  |
|                        | This stage of cascade | 1000                 | 311                                      | 429        | 175               | 43       |               |           |               |        |           |      |
| Married                | Cumulative            | 1000                 | 260                                      | 693        | 901               | 950      | 950           | 50        | 1.01%         | 0.96%  | 0.05%     | 1880 |
|                        | This stage of cascade | 1000                 | 260                                      | 433        | 208               | 49       |               |           |               |        |           |      |
| Divorced or separated  | Cumulative            | 1000                 | 319                                      | 750        | 889               | 945      | 945           | 55        | 2.55%         | 2.41%  | 0.14%     | 83   |
|                        | This stage of cascade | 1000                 | 319                                      | 431        | 139               | 56       |               |           |               |        |           |      |
| Widowed                | Cumulative            | 1000                 | 136                                      | 591        | 773               | 887      | 887           | 113       | 0.00%         | 0.00%  | 0.00%     | 21   |
|                        | This stage of cascade | 1000                 | 136                                      | 455        | 182               | 114      |               |           |               |        |           |      |
| Location               |                       |                      |                                          |            |                   |          |               |           |               |        |           |      |
| Towns                  | Cumulative            | 1000                 | 235                                      | 678        | 870               | 935      | 935           | 65        | 1.58%         | 1.48%  | 0.10%     | 607  |
|                        | This stage of cascade | 1000                 | 235                                      | 443        | 192               | 65       |               |           |               |        |           |      |
| Estates                | Cumulative            | 1000                 | 406                                      | 788        | 919               | 959      | 959           | 41        | 1.02%         | 0.98%  | 0.04%     | 712  |
|                        | This stage of cascade | 1000                 | 406                                      | 382        | 131               | 40       |               |           |               |        |           |      |
| Small villages         | Cumulative            | 1000                 | 221                                      | 672        | 910               | 955      | 955           | 45        | 0.73%         | 0.70%  | 0.03%     | 1433 |
|                        | This stage of cascade | 1000                 | 221                                      | 451        | 238               | 45       |               |           |               |        |           |      |
| Casual sexual partners |                       |                      |                                          |            |                   |          |               |           |               |        |           |      |
| ≥1 in last 3 years     | Cumulative            | 1000                 | 270                                      | 693        | 838               | 919      | 919           | 81        | 1.58%         | 1.45%  | 0.13%     | 689  |
|                        | This stage of cascade | 1000                 | 270                                      | 423        | 145               | 81       |               |           |               |        |           |      |
| None in last 3 years   | Cumulative            | 1000                 | 269                                      | 704        | 926               | 963      | 963           | 37        | 0.81%         | 0.78%  | 0.03%     | 2060 |
|                        | This stage of cascade | 1000                 | 269                                      | 435        | 222               | 37       |               |           |               |        |           |      |

**Table A2c: HIV prevention cascades for HTC and sexual partner reduction for men by population sub-group, Manicaland, Zimbabwe, 2009-2011**



| Population sub-group   |                       | Infections potential | Infections not prevented due to lack of: |            |                   |          | Infections    |           | HIV incidence |        |           |      |
|------------------------|-----------------------|----------------------|------------------------------------------|------------|-------------------|----------|---------------|-----------|---------------|--------|-----------|------|
|                        |                       |                      | HTC availability                         | HTC uptake | Partner reduction | Efficacy | Not prevented | Prevented | Potential     | Actual | Prevented | PY   |
| All women              | Cumulative            | 1000                 | 204                                      | 509        | 975               | 987      | 987           | 13        | 0.85%         | 0.84%  | 0.01%     | 6076 |
|                        | This stage of cascade | 1000                 | 204                                      | 305        | 466               | 12       |               |           |               |        |           |      |
| Sexually-active women  | Cumulative            | 1000                 | 151                                      | 420        | 970               | 985      | 985           | 15        | 0.90%         | 0.89%  | 0.01%     | 5735 |
|                        | This stage of cascade | 1000                 | 151                                      | 269        | 550               | 15       |               |           |               |        |           |      |
| Age-group              |                       |                      |                                          |            |                   |          |               |           |               |        |           |      |
| 15-19                  | Cumulative            | 1000                 | 239                                      | 428        | 967               | 983      | 983           | 17        | 0.97%         | 0.95%  | 0.02%     | 315  |
|                        | This stage of cascade | 1000                 | 239                                      | 189        | 539               | 16       |               |           |               |        |           |      |
| 20-24                  | Cumulative            | 1000                 | 159                                      | 329        | 980               | 990      | 990           | 10        | 0.93%         | 0.92%  | 0.01%     | 868  |
|                        | This stage of cascade | 1000                 | 159                                      | 170        | 651               | 10       |               |           |               |        |           |      |
| 25-34                  | Cumulative            | 1000                 | 104                                      | 335        | 964               | 982      | 982           | 18        | 1.62%         | 1.59%  | 0.03%     | 1638 |
|                        | This stage of cascade | 1000                 | 104                                      | 231        | 629               | 18       |               |           |               |        |           |      |
| 35-44                  | Cumulative            | 1000                 | 145                                      | 466        | 965               | 982      | 982           | 18        | 0.60%         | 0.59%  | 0.01%     | 1529 |
|                        | This stage of cascade | 1000                 | 145                                      | 321        | 499               | 17       |               |           |               |        |           |      |
| 45-54                  | Cumulative            | 1000                 | 194                                      | 584        | 979               | 990      | 990           | 10        | 0.36%         | 0.36%  | 0.00%     | 1384 |
|                        | This stage of cascade | 1000                 | 194                                      | 390        | 395               | 11       |               |           |               |        |           |      |
| Marital status         |                       |                      |                                          |            |                   |          |               |           |               |        |           |      |
| Single                 | Cumulative            | 1000                 | 281                                      | 588        | 965               | 983      | 983           | 17        | 1.98%         | 1.94%  | 0.04%     | 412  |
|                        | This stage of cascade | 1000                 | 281                                      | 307        | 377               | 18       |               |           |               |        |           |      |
| Married                | Cumulative            | 1000                 | 143                                      | 393        | 973               | 987      | 987           | 13        | 0.71%         | 0.70%  | 0.01%     | 4278 |
|                        | This stage of cascade | 1000                 | 143                                      | 250        | 580               | 14       |               |           |               |        |           |      |
| Divorced or separated  | Cumulative            | 1000                 | 153                                      | 482        | 943               | 972      | 972           | 28        | 2.31%         | 2.24%  | 0.07%     | 403  |
|                        | This stage of cascade | 1000                 | 153                                      | 329        | 461               | 29       |               |           |               |        |           |      |
| Widowed                | Cumulative            | 1000                 | 176                                      | 552        | 977               | 989      | 989           | 11        | 0.63%         | 0.62%  | 0.01%     | 643  |
|                        | This stage of cascade | 1000                 | 176                                      | 376        | 425               | 12       |               |           |               |        |           |      |
| Location               |                       |                      |                                          |            |                   |          |               |           |               |        |           |      |
| Towns                  | Cumulative            | 1000                 | 102                                      | 355        | 979               | 990      | 990           | 10        | 1.97%         | 1.95%  | 0.02%     | 922  |
|                        | This stage of cascade | 1000                 | 102                                      | 253        | 624               | 11       |               |           |               |        |           |      |
| Estates                | Cumulative            | 1000                 | 233                                      | 495        | 977               | 989      | 989           | 11        | 0.84%         | 0.83%  | 0.01%     | 1090 |
|                        | This stage of cascade | 1000                 | 233                                      | 262        | 482               | 12       |               |           |               |        |           |      |
| Small villages         | Cumulative            | 1000                 | 142                                      | 420        | 965               | 982      | 982           | 18        | 0.65%         | 0.64%  | 0.01%     | 3723 |
|                        | This stage of cascade | 1000                 | 142                                      | 278        | 545               | 17       |               |           |               |        |           |      |
| Casual sexual partners |                       |                      |                                          |            |                   |          |               |           |               |        |           |      |
| ≥1 in last 3 years     | Cumulative            | 1000                 | 214                                      | 498        | 949               | 975      | 975           | 25        | 4.36%         | 4.25%  | 0.11%     | 259  |
|                        | This stage of cascade | 1000                 | 214                                      | 284        | 451               | 26       |               |           |               |        |           |      |
| None in last 3 years   | Cumulative            | 1000                 | 147                                      | 416        | 972               | 986      | 986           | 14        | 0.74%         | 0.73%  | 0.01%     | 5464 |
|                        | This stage of cascade | 1000                 | 147                                      | 269        | 556               | 14       |               |           |               |        |           |      |

**Table A2d: HIV prevention cascades for HTC and sexual partner reduction for women by population sub-group, Manicaland, Zimbabwe, 2009-2011**

| Population sub-group   |                       | Infections | Infections not prevented due to lack of: |            |                   |          | Infections    |           | HIV incidence |        |           |      |
|------------------------|-----------------------|------------|------------------------------------------|------------|-------------------|----------|---------------|-----------|---------------|--------|-----------|------|
|                        |                       | potential  | HTC availability                         | HTC uptake | Partner reduction | Efficacy | Not prevented | Prevented | Potential     | Actual | Prevented | PY   |
| All men                | Cumulative            | 1000       | 152                                      | 525        | 871               | 935      | 935           | 65        | 0.57%         | 0.53%  | 0.04%     | 3762 |
|                        | This stage of cascade | 1000       | 152                                      | 373        | 346               | 64       |               |           |               |        |           |      |
| Sexually-active men    | Cumulative            | 1000       | 84                                       | 406        | 820               | 910      | 910           | 90        | 0.74%         | 0.67%  | 0.07%     | 2968 |
|                        | This stage of cascade | 1000       | 84                                       | 322        | 414               | 90       |               |           |               |        |           |      |
| Age-group              |                       |            |                                          |            |                   |          |               |           |               |        |           |      |
| 15-19                  | Cumulative            | 1000       | 163                                      | 558        | 860               | 930      | 930           | 70        | 0.30%         | 0.28%  | 0.02%     | 357  |
|                        | This stage of cascade | 1000       | 163                                      | 395        | 302               | 70       |               |           |               |        |           |      |
| 20-24                  | Cumulative            | 1000       | 97                                       | 436        | 834               | 917      | 917           | 83        | 0.00%         | 0.00%  | 0.00%     | 420  |
|                        | This stage of cascade | 1000       | 97                                       | 339        | 398               | 83       |               |           |               |        |           |      |
| 25-34                  | Cumulative            | 1000       | 84                                       | 371        | 790               | 895      | 895           | 105       | 0.99%         | 0.89%  | 0.10%     | 1006 |
|                        | This stage of cascade | 1000       | 84                                       | 287        | 419               | 105      |               |           |               |        |           |      |
| 35-44                  | Cumulative            | 1000       | 48                                       | 405        | 835               | 918      | 918           | 82        | 1.08%         | 0.99%  | 0.09%     | 708  |
|                        | This stage of cascade | 1000       | 48                                       | 357        | 430               | 83       |               |           |               |        |           |      |
| 45-54                  | Cumulative            | 1000       | 98                                       | 406        | 841               | 920      | 920           | 80        | 0.68%         | 0.63%  | 0.05%     | 476  |
|                        | This stage of cascade | 1000       | 98                                       | 308        | 435               | 79       |               |           |               |        |           |      |
| Marital status         |                       |            |                                          |            |                   |          |               |           |               |        |           |      |
| Single                 | Cumulative            | 1000       | 104                                      | 530        | 828               | 914      | 914           | 86        | 0.14%         | 0.13%  | 0.01%     | 777  |
|                        | This stage of cascade | 1000       | 104                                      | 426        | 298               | 86       |               |           |               |        |           |      |
| Married                | Cumulative            | 1000       | 77                                       | 360        | 823               | 912      | 912           | 88        | 0.79%         | 0.72%  | 0.07%     | 2086 |
|                        | This stage of cascade | 1000       | 77                                       | 283        | 463               | 89       |               |           |               |        |           |      |
| Divorced or separated  | Cumulative            | 1000       | 96                                       | 521        | 754               | 877      | 877           | 123       | 2.99%         | 2.62%  | 0.37%     | 76   |
|                        | This stage of cascade | 1000       | 96                                       | 425        | 233               | 123      |               |           |               |        |           |      |
| Widowed                | Cumulative            | 1000       | 0                                        | 250        | 667               | 834      | 834           | 166       | 8.66%         | 7.22%  | 1.44%     | 28   |
|                        | This stage of cascade | 1000       | 0                                        | 250        | 417               | 167      |               |           |               |        |           |      |
| Location               |                       |            |                                          |            |                   |          |               |           |               |        |           |      |
| Towns                  | Cumulative            | 1000       | 87                                       | 412        | 810               | 905      | 905           | 95        | 0.53%         | 0.48%  | 0.05%     | 832  |
|                        | This stage of cascade | 1000       | 87                                       | 325        | 398               | 95       |               |           |               |        |           |      |
| Estates                | Cumulative            | 1000       | 108                                      | 418        | 816               | 908      | 908           | 92        | 1.25%         | 1.13%  | 0.12%     | 696  |
|                        | This stage of cascade | 1000       | 108                                      | 310        | 398               | 92       |               |           |               |        |           |      |
| Small villages         | Cumulative            | 1000       | 72                                       | 397        | 826               | 913      | 913           | 87        | 0.69%         | 0.63%  | 0.06%     | 1439 |
|                        | This stage of cascade | 1000       | 72                                       | 325        | 429               | 87       |               |           |               |        |           |      |
| Casual sexual partners |                       |            |                                          |            |                   |          |               |           |               |        |           |      |
| ≥1 in last 3 years     | Cumulative            | 1000       | 89                                       | 451        | 770               | 885      | 885           | 115       | 1.26%         | 1.11%  | 0.14%     | 988  |
|                        | This stage of cascade | 1000       | 89                                       | 362        | 319               | 115      |               |           |               |        |           |      |
| None in last 3 years   | Cumulative            | 1000       | 80                                       | 377        | 847               | 924      | 924           | 76        | 0.45%         | 0.41%  | 0.03%     | 1696 |
|                        | This stage of cascade | 1000       | 80                                       | 297        | 470               | 77       |               |           |               |        |           |      |

**Table A2e: HIV prevention cascades for HTC and sexual partner reduction for men by population sub-group, Manicaland, Zimbabwe, 2012-2013**

| Population sub-group          |                       | Infections potential | Infections not prevented due to lack of: |            |                   |          | Infections Not prevented | Infections Prevented | HIV incidence |        |           |      |
|-------------------------------|-----------------------|----------------------|------------------------------------------|------------|-------------------|----------|--------------------------|----------------------|---------------|--------|-----------|------|
|                               |                       |                      | HTC availability                         | HTC uptake | Partner reduction | Efficacy |                          |                      | Potential     | Actual | Prevented | PY   |
| All women                     | Cumulative            | 1000                 | 88                                       | 314        | 976               | 988      | 988                      | 12                   | 0.75%         | 0.74%  | 0.01%     | 7047 |
|                               | This stage of cascade | 1000                 | 88                                       | 226        | 662               | 12       |                          |                      |               |        |           |      |
| Sexually-active women         | Cumulative            | 1000                 | 53                                       | 227        | 973               | 987      | 987                      | 13                   | 0.80%         | 0.79%  | 0.01%     | 6620 |
|                               | This stage of cascade | 1000                 | 53                                       | 174        | 746               | 14       |                          |                      |               |        |           |      |
| <b>Age-group</b>              |                       |                      |                                          |            |                   |          |                          |                      |               |        |           |      |
| 15-19                         | Cumulative            | 1000                 | 94                                       | 214        | 965               | 982      | 982                      | 18                   | 0.27%         | 0.26%  | 0.01%     | 380  |
|                               | This stage of cascade | 1000                 | 94                                       | 120        | 751               | 17       |                          |                      |               |        |           |      |
| 20-24                         | Cumulative            | 1000                 | 40                                       | 106        | 978               | 989      | 989                      | 11                   | 1.89%         | 1.87%  | 0.02%     | 908  |
|                               | This stage of cascade | 1000                 | 40                                       | 66         | 872               | 11       |                          |                      |               |        |           |      |
| 25-34                         | Cumulative            | 1000                 | 41                                       | 171        | 973               | 986      | 986                      | 14                   | 0.78%         | 0.77%  | 0.01%     | 2070 |
|                               | This stage of cascade | 1000                 | 41                                       | 130        | 802               | 13       |                          |                      |               |        |           |      |
| 35-44                         | Cumulative            | 1000                 | 49                                       | 250        | 974               | 987      | 987                      | 13                   | 0.82%         | 0.81%  | 0.01%     | 1611 |
|                               | This stage of cascade | 1000                 | 49                                       | 201        | 724               | 13       |                          |                      |               |        |           |      |
| 45-54                         | Cumulative            | 1000                 | 69                                       | 401        | 969               | 984      | 984                      | 16                   | 0.31%         | 0.30%  | 0.01%     | 1651 |
|                               | This stage of cascade | 1000                 | 69                                       | 332        | 568               | 15       |                          |                      |               |        |           |      |
| <b>Marital status</b>         |                       |                      |                                          |            |                   |          |                          |                      |               |        |           |      |
| Single                        | Cumulative            | 1000                 | 90                                       | 385        | 936               | 968      | 968                      | 32                   | 1.61%         | 1.56%  | 0.05%     | 257  |
|                               | This stage of cascade | 1000                 | 90                                       | 295        | 551               | 32       |                          |                      |               |        |           |      |
| Married                       | Cumulative            | 1000                 | 45                                       | 202        | 980               | 990      | 990                      | 10                   | 0.78%         | 0.77%  | 0.01%     | 5333 |
|                               | This stage of cascade | 1000                 | 45                                       | 157        | 778               | 10       |                          |                      |               |        |           |      |
| Divorced or separated         | Cumulative            | 1000                 | 88                                       | 246        | 920               | 960      | 960                      | 40                   | 0.84%         | 0.81%  | 0.03%     | 376  |
|                               | This stage of cascade | 1000                 | 88                                       | 158        | 674               | 40       |                          |                      |               |        |           |      |
| Widowed                       | Cumulative            | 1000                 | 79                                       | 401        | 962               | 981      | 981                      | 19                   | 0.61%         | 0.60%  | 0.01%     | 661  |
|                               | This stage of cascade | 1000                 | 79                                       | 322        | 561               | 19       |                          |                      |               |        |           |      |
| <b>Location</b>               |                       |                      |                                          |            |                   |          |                          |                      |               |        |           |      |
| Towns                         | Cumulative            | 1000                 | 113                                      | 279        | 989               | 994      | 994                      | 6                    | 0.86%         | 0.85%  | 0.01%     | 1412 |
|                               | This stage of cascade | 1000                 | 113                                      | 166        | 710               | 5        |                          |                      |               |        |           |      |
| Estates                       | Cumulative            | 1000                 | 53                                       | 204        | 954               | 977      | 977                      | 23                   | 0.73%         | 0.71%  | 0.02%     | 1267 |
|                               | This stage of cascade | 1000                 | 53                                       | 151        | 750               | 23       |                          |                      |               |        |           |      |
| Small villages                | Cumulative            | 1000                 | 27                                       | 212        | 973               | 987      | 987                      | 13                   | 0.80%         | 0.79%  | 0.01%     | 3940 |
|                               | This stage of cascade | 1000                 | 27                                       | 185        | 761               | 14       |                          |                      |               |        |           |      |
| <b>Casual sexual partners</b> |                       |                      |                                          |            |                   |          |                          |                      |               |        |           |      |
| ≥1 in last 3 years            | Cumulative            | 1000                 | 53                                       | 188        | 932               | 966      | 966                      | 34                   | 2.65%         | 2.56%  | 0.09%     | 234  |
|                               | This stage of cascade | 1000                 | 53                                       | 135        | 744               | 34       |                          |                      |               |        |           |      |
| None in last 3 years          | Cumulative            | 1000                 | 53                                       | 223        | 974               | 987      | 987                      | 13                   | 0.71%         | 0.70%  | 0.01%     | 5874 |
|                               | This stage of cascade | 1000                 | 53                                       | 170        | 751               | 13       |                          |                      |               |        |           |      |

**Table A2f: HIV prevention cascades for HTC and sexual partner reduction for women by population sub-group, Manicaland, Zimbabwe, 2012-2013**

| Population sub-group   |                       | Infections potential | Infections not prevented due to lack of: |            |                      |          | Infections    |           | HIV incidence |        |           |      |
|------------------------|-----------------------|----------------------|------------------------------------------|------------|----------------------|----------|---------------|-----------|---------------|--------|-----------|------|
|                        |                       |                      | HTC availability                         | HTC uptake | Increased condom use | Efficacy | Not prevented | Prevented | Potential     | Actual | Prevented | PY   |
| All men                | Cumulative            | 1000                 | 361                                      | 793        | 975                  | 980      | 980           | 20        | 0.75%         | 0.73%  | 0.01%     | 3547 |
|                        | This stage of cascade | 1000                 | 361                                      | 432        | 182                  | 5        |               |           |               |        |           |      |
| Sexually-active men    | Cumulative            | 1000                 | 270                                      | 702        | 958                  | 966      | 966           | 34        | 0.97%         | 0.94%  | 0.03%     | 2752 |
|                        | This stage of cascade | 1000                 | 270                                      | 432        | 256                  | 8        |               |           |               |        |           |      |
| Age-group              |                       |                      |                                          |            |                      |          |               |           |               |        |           |      |
|                        |                       |                      |                                          |            |                      |          |               |           |               |        |           |      |
| 15-19                  | Cumulative            | 1000                 | 328                                      | 853        | 984                  | 987      | 987           | 13        | 0.00%         | 0.00%  | 0.00%     | 265  |
|                        | This stage of cascade | 1000                 | 328                                      | 525        | 131                  | 3        |               |           |               |        |           |      |
| 20-24                  | Cumulative            | 1000                 | 306                                      | 705        | 945                  | 956      | 956           | 44        | 0.67%         | 0.64%  | 0.03%     | 463  |
|                        | This stage of cascade | 1000                 | 306                                      | 399        | 240                  | 11       |               |           |               |        |           |      |
| 25-34                  | Cumulative            | 1000                 | 234                                      | 673        | 955                  | 964      | 964           | 36        | 1.42%         | 1.37%  | 0.05%     | 949  |
|                        | This stage of cascade | 1000                 | 234                                      | 439        | 282                  | 9        |               |           |               |        |           |      |
| 35-44                  | Cumulative            | 1000                 | 260                                      | 702        | 964                  | 971      | 971           | 29        | 1.26%         | 1.22%  | 0.04%     | 575  |
|                        | This stage of cascade | 1000                 | 260                                      | 442        | 262                  | 7        |               |           |               |        |           |      |
| 45-54                  | Cumulative            | 1000                 | 337                                      | 746        | 965                  | 972      | 972           | 28        | 0.62%         | 0.60%  | 0.02%     | 500  |
|                        | This stage of cascade | 1000                 | 337                                      | 409        | 219                  | 7        |               |           |               |        |           |      |
| Marital status         |                       |                      |                                          |            |                      |          |               |           |               |        |           |      |
|                        |                       |                      |                                          |            |                      |          |               |           |               |        |           |      |
| Single                 | Cumulative            | 1000                 | 311                                      | 740        | 915                  | 932      | 932           | 68        | 0.79%         | 0.78%  | 0.01%     | 768  |
|                        | This stage of cascade | 1000                 | 311                                      | 429        | 175                  | 17       |               |           |               |        |           |      |
| Married                | Cumulative            | 1000                 | 260                                      | 693        | 970                  | 976      | 976           | 24        | 1.01%         | 0.96%  | 0.05%     | 1880 |
|                        | This stage of cascade | 1000                 | 260                                      | 433        | 277                  | 6        |               |           |               |        |           |      |
| Divorced or separated  | Cumulative            | 1000                 | 319                                      | 750        | 931                  | 945      | 945           | 55        | 2.55%         | 2.41%  | 0.14%     | 83   |
|                        | This stage of cascade | 1000                 | 319                                      | 431        | 181                  | 14       |               |           |               |        |           |      |
| Widowed                | Cumulative            | 1000                 | 136                                      | 591        | 864                  | 891      | 891           | 109       | 0.00%         | 0.00%  | 0.00%     | 21   |
|                        | This stage of cascade | 1000                 | 136                                      | 455        | 273                  | 27       |               |           |               |        |           |      |
| Location               |                       |                      |                                          |            |                      |          |               |           |               |        |           |      |
|                        |                       |                      |                                          |            |                      |          |               |           |               |        |           |      |
| Towns                  | Cumulative            | 1000                 | 235                                      | 678        | 947                  | 958      | 958           | 42        | 1.55%         | 1.48%  | 0.07%     | 607  |
|                        | This stage of cascade | 1000                 | 235                                      | 443        | 269                  | 11       |               |           |               |        |           |      |
| Estates                | Cumulative            | 1000                 | 406                                      | 788        | 971                  | 977      | 977           | 23        | 1.00%         | 0.98%  | 0.02%     | 712  |
|                        | This stage of cascade | 1000                 | 406                                      | 382        | 183                  | 6        |               |           |               |        |           |      |
| Small villages         | Cumulative            | 1000                 | 221                                      | 672        | 957                  | 966      | 966           | 34        | 0.73%         | 0.70%  | 0.03%     | 1433 |
|                        | This stage of cascade | 1000                 | 221                                      | 451        | 285                  | 9        |               |           |               |        |           |      |
| Casual sexual partners |                       |                      |                                          |            |                      |          |               |           |               |        |           |      |
|                        |                       |                      |                                          |            |                      |          |               |           |               |        |           |      |
| ≥1 in last 3 years     | Cumulative            | 1000                 | 270                                      | 693        | 912                  | 930      | 930           | 70        | 1.56%         | 1.45%  | 0.11%     | 689  |
|                        | This stage of cascade | 1000                 | 270                                      | 423        | 219                  | 18       |               |           |               |        |           |      |
| None in last 3 years   | Cumulative            | 1000                 | 269                                      | 704        | 976                  | 981      | 981           | 19        | 0.80%         | 0.78%  | 0.02%     | 2060 |
|                        | This stage of cascade | 1000                 | 269                                      | 435        | 272                  | 5        |               |           |               |        |           |      |

Table A2g: HIV prevention cascades for HTC and increased condom use for men by population sub-group, Manicaland, Zimbabwe, 2009-2011

| Population sub-group   |                       | Infections potential | Infections not prevented due to lack of: |            |                      |          | Infections    |           | HIV incidence |        |           |      |
|------------------------|-----------------------|----------------------|------------------------------------------|------------|----------------------|----------|---------------|-----------|---------------|--------|-----------|------|
|                        |                       |                      | HTC availability                         | HTC uptake | Increased condom use | Efficacy | Not prevented | Prevented | Potential     | Actual | Prevented | PY   |
| All women              | Cumulative            | 1000                 | 204                                      | 509        | 980                  | 984      | 984           | 16        | 0.85%         | 0.84%  | 0.01%     | 6076 |
|                        | This stage of cascade | 1000                 | 204                                      | 305        | 471                  | 4        |               |           |               |        |           |      |
| Sexually-active women  | Cumulative            | 1000                 | 151                                      | 420        | 976                  | 981      | 981           | 19        | 0.91%         | 0.89%  | 0.02%     | 5735 |
|                        | This stage of cascade | 1000                 | 151                                      | 269        | 556                  | 5        |               |           |               |        |           |      |
| Age-group              |                       |                      |                                          |            |                      |          |               |           |               |        |           |      |
|                        | 15-19                 | Cumulative           | 1000                                     | 239        | 428                  | 984      | 987           | 13        | 0.96%         | 0.95%  | 0.01%     | 315  |
|                        | This stage of cascade | 1000                 | 239                                      | 189        | 556                  | 3        |               |           |               |        |           |      |
| 20-24                  | Cumulative            | 1000                 | 159                                      | 329        | 987                  | 990      | 10            | 0.93%     | 0.92%         | 0.01%  | 868       |      |
|                        | This stage of cascade | 1000                 | 159                                      | 170        | 658                  | 3        |               |           |               |        |           |      |
| 25-34                  | Cumulative            | 1000                 | 104                                      | 335        | 977                  | 982      | 18            | 1.62%     | 1.59%         | 0.03%  | 1638      |      |
|                        | This stage of cascade | 1000                 | 104                                      | 231        | 642                  | 5        |               |           |               |        |           |      |
| 35-44                  | Cumulative            | 1000                 | 145                                      | 466        | 968                  | 974      | 26            | 0.61%     | 0.59%         | 0.02%  | 1529      |      |
|                        | This stage of cascade | 1000                 | 145                                      | 321        | 502                  | 6        |               |           |               |        |           |      |
| 45-54                  | Cumulative            | 1000                 | 194                                      | 584        | 972                  | 978      | 22            | 0.37%     | 0.36%         | 0.01%  | 1384      |      |
|                        | This stage of cascade | 1000                 | 194                                      | 390        | 388                  | 6        |               |           |               |        |           |      |
| Marital status         |                       |                      |                                          |            |                      |          |               |           |               |        |           |      |
|                        | Single                | Cumulative           | 1000                                     | 281        | 588                  | 983      | 987           | 13        | 1.97%         | 1.94%  | 0.03%     | 412  |
|                        | This stage of cascade | 1000                 | 281                                      | 307        | 395                  | 4        |               |           |               |        |           |      |
| Married                | Cumulative            | 1000                 | 143                                      | 393        | 974                  | 979      | 21            | 0.72%     | 0.70%         | 0.02%  | 4278      |      |
|                        | This stage of cascade | 1000                 | 143                                      | 250        | 581                  | 5        |               |           |               |        |           |      |
| Divorced or separated  | Cumulative            | 1000                 | 153                                      | 482        | 974                  | 979      | 21            | 2.29%     | 2.24%         | 0.05%  | 403       |      |
|                        | This stage of cascade | 1000                 | 153                                      | 329        | 492                  | 5        |               |           |               |        |           |      |
| Widowed                | Cumulative            | 1000                 | 176                                      | 552        | 1000                 | 1000     | 0             | 0.62%     | 0.62%         | 0.00%  | 643       |      |
|                        | This stage of cascade | 1000                 | 176                                      | 376        | 448                  | 0        |               |           |               |        |           |      |
| Location               |                       |                      |                                          |            |                      |          |               |           |               |        |           |      |
|                        | Towns                 | Cumulative           | 1000                                     | 102        | 355                  | 975      | 980           | 20        | 1.99%         | 1.95%  | 0.04%     | 922  |
|                        | This stage of cascade | 1000                 | 102                                      | 253        | 620                  | 5        |               |           |               |        |           |      |
| Estates                | Cumulative            | 1000                 | 233                                      | 495        | 964                  | 971      | 29            | 0.86%     | 0.83%         | 0.03%  | 1090      |      |
|                        | This stage of cascade | 1000                 | 233                                      | 262        | 469                  | 7        |               |           |               |        |           |      |
| Small villages         | Cumulative            | 1000                 | 142                                      | 420        | 980                  | 984      | 16            | 0.65%     | 0.64%         | 0.01%  | 3723      |      |
|                        | This stage of cascade | 1000                 | 142                                      | 278        | 560                  | 4        |               |           |               |        |           |      |
| Casual sexual partners |                       |                      |                                          |            |                      |          |               |           |               |        |           |      |
|                        | ≥1 in last 3 years    | Cumulative           | 1000                                     | 214        | 498                  | 963      | 970           | 30        | 4.38%         | 4.25%  | 0.13%     | 259  |
|                        | This stage of cascade | 1000                 | 214                                      | 284        | 465                  | 7        |               |           |               |        |           |      |
| None in last 3 years   | Cumulative            | 1000                 | 147                                      | 416        | 977                  | 982      | 18            | 0.74%     | 0.73%         | 0.01%  | 5464      |      |
|                        | This stage of cascade | 1000                 | 147                                      | 269        | 561                  | 5        |               |           |               |        |           |      |

**Table A2h: HIV prevention cascades for HTC and increased condom use for women by population sub-group, Manicaland, Zimbabwe, 2009-2011**

| Population sub-group   |                       | Infections potential | Infections not prevented due to lack of: |            |                      |          | Infections    |           | HIV incidence |        |           |      |
|------------------------|-----------------------|----------------------|------------------------------------------|------------|----------------------|----------|---------------|-----------|---------------|--------|-----------|------|
|                        |                       |                      | HTC availability                         | HTC uptake | Increased condom use | Efficacy | Not prevented | Prevented | Potential     | Actual | Prevented | PY   |
| All men                | Cumulative            | 1000                 | 152                                      | 525        | 951                  | 961      | 961           | 39        | 0.55%         | 0.53%  | 0.02%     | 3762 |
|                        | This stage of cascade | 1000                 | 152                                      | 373        | 426                  | 10       |               |           |               |        |           |      |
| Sexually-active men    | Cumulative            | 1000                 | 84                                       | 406        | 924                  | 939      | 939           | 61        | 0.71%         | 0.67%  | 0.04%     | 2968 |
|                        | This stage of cascade | 1000                 | 84                                       | 322        | 518                  | 15       |               |           |               |        |           |      |
| Age-group              |                       |                      |                                          |            |                      |          |               |           |               |        |           |      |
| 15-19                  | Cumulative            | 1000                 | 163                                      | 558        | 872                  | 898      | 898           | 102       | 0.31%         | 0.28%  | 0.03%     | 357  |
|                        | This stage of cascade | 1000                 | 163                                      | 395        | 314                  | 26       |               |           |               |        |           |      |
| 20-24                  | Cumulative            | 1000                 | 97                                       | 436        | 894                  | 915      | 915           | 85        | 0.00%         | 0.00%  | 0.00%     | 420  |
|                        | This stage of cascade | 1000                 | 97                                       | 339        | 458                  | 21       |               |           |               |        |           |      |
| 25-34                  | Cumulative            | 1000                 | 84                                       | 371        | 936                  | 949      | 949           | 51        | 0.94%         | 0.89%  | 0.05%     | 1006 |
|                        | This stage of cascade | 1000                 | 84                                       | 287        | 565                  | 13       |               |           |               |        |           |      |
| 35-44                  | Cumulative            | 1000                 | 48                                       | 405        | 939                  | 951      | 951           | 49        | 1.04%         | 0.99%  | 0.05%     | 708  |
|                        | This stage of cascade | 1000                 | 48                                       | 357        | 534                  | 12       |               |           |               |        |           |      |
| 45-54                  | Cumulative            | 1000                 | 98                                       | 406        | 920                  | 936      | 936           | 64        | 0.67%         | 0.63%  | 0.04%     | 476  |
|                        | This stage of cascade | 1000                 | 98                                       | 308        | 514                  | 16       |               |           |               |        |           |      |
| Marital status         |                       |                      |                                          |            |                      |          |               |           |               |        |           |      |
| Single                 | Cumulative            | 1000                 | 104                                      | 530        | 864                  | 891      | 891           | 109       | 0.15%         | 0.13%  | 0.02%     | 777  |
|                        | This stage of cascade | 1000                 | 104                                      | 426        | 334                  | 27       |               |           |               |        |           |      |
| Married                | Cumulative            | 1000                 | 77                                       | 360        | 951                  | 961      | 961           | 39        | 0.75%         | 0.72%  | 0.03%     | 2086 |
|                        | This stage of cascade | 1000                 | 77                                       | 283        | 591                  | 10       |               |           |               |        |           |      |
| Divorced or separated  | Cumulative            | 1000                 | 96                                       | 521        | 822                  | 858      | 858           | 142       | 3.06%         | 2.62%  | 0.44%     | 76   |
|                        | This stage of cascade | 1000                 | 96                                       | 425        | 301                  | 36       |               |           |               |        |           |      |
| Widowed                | Cumulative            | 1000                 | 0                                        | 250        | 750                  | 800      | 800           | 200       | 9.03%         | 7.22%  | 1.81%     | 28   |
|                        | This stage of cascade | 1000                 | 0                                        | 250        | 500                  | 50       |               |           |               |        |           |      |
| Location               |                       |                      |                                          |            |                      |          |               |           |               |        |           |      |
| Towns                  | Cumulative            | 1000                 | 87                                       | 412        | 940                  | 952      | 952           | 48        | 0.50%         | 0.48%  | 0.02%     | 832  |
|                        | This stage of cascade | 1000                 | 87                                       | 325        | 528                  | 12       |               |           |               |        |           |      |
| Estates                | Cumulative            | 1000                 | 108                                      | 418        | 900                  | 920      | 920           | 80        | 1.23%         | 1.13%  | 0.10%     | 696  |
|                        | This stage of cascade | 1000                 | 108                                      | 310        | 482                  | 20       |               |           |               |        |           |      |
| Small villages         | Cumulative            | 1000                 | 72                                       | 397        | 927                  | 942      | 942           | 58        | 0.67%         | 0.63%  | 0.04%     | 1439 |
|                        | This stage of cascade | 1000                 | 72                                       | 325        | 530                  | 15       |               |           |               |        |           |      |
| Casual sexual partners |                       |                      |                                          |            |                      |          |               |           |               |        |           |      |
| ≥1 in last 3 years     | Cumulative            | 1000                 | 89                                       | 451        | 868                  | 894      | 894           | 106       | 1.24%         | 1.11%  | 0.13%     | 988  |
|                        | This stage of cascade | 1000                 | 89                                       | 362        | 417                  | 26       |               |           |               |        |           |      |
| None in last 3 years   | Cumulative            | 1000                 | 80                                       | 377        | 957                  | 966      | 966           | 34        | 0.43%         | 0.41%  | 0.02%     | 1696 |
|                        | This stage of cascade | 1000                 | 80                                       | 297        | 580                  | 9        |               |           |               |        |           |      |

**Table A2i: HIV prevention cascades for HTC and increased condom use for men by population sub-group, Manicaland, Zimbabwe, 2012-2013**

| Population sub-group   |                       | Infections potential | Infections not prevented due to lack of: |            |                      |          | Infections    |           | HIV incidence |        |           |      |
|------------------------|-----------------------|----------------------|------------------------------------------|------------|----------------------|----------|---------------|-----------|---------------|--------|-----------|------|
|                        |                       |                      | HTC availability                         | HTC uptake | Increased condom use | Efficacy | Not prevented | Prevented | Potential     | Actual | Prevented | PY   |
| All women              | Cumulative            | 1000                 | 88                                       | 314        | 974                  | 979      | 979           | 21        | 0.76%         | 0.74%  | 0.02%     | 7047 |
|                        | This stage of cascade | 1000                 | 88                                       | 226        | 660                  | 5        |               |           |               |        |           |      |
| Sexually-active women  | Cumulative            | 1000                 | 53                                       | 227        | 970                  | 976      | 976           | 24        | 0.81%         | 0.79%  | 0.02%     | 6620 |
|                        | This stage of cascade | 1000                 | 53                                       | 174        | 743                  | 6        |               |           |               |        |           |      |
| Age-group              |                       |                      |                                          |            |                      |          |               |           |               |        |           |      |
| 15-19                  | Cumulative            | 1000                 | 94                                       | 214        | 995                  | 996      | 996           | 4         | 0.26%         | 0.26%  | 0.00%     | 380  |
|                        | This stage of cascade | 1000                 | 94                                       | 120        | 781                  | 1        |               |           |               |        |           |      |
| 20-24                  | Cumulative            | 1000                 | 40                                       | 106        | 985                  | 988      | 988           | 12        | 1.89%         | 1.87%  | 0.02%     | 908  |
|                        | This stage of cascade | 1000                 | 40                                       | 66         | 879                  | 3        |               |           |               |        |           |      |
| 25-34                  | Cumulative            | 1000                 | 41                                       | 171        | 973                  | 978      | 978           | 22        | 0.79%         | 0.77%  | 0.02%     | 2070 |
|                        | This stage of cascade | 1000                 | 41                                       | 130        | 802                  | 5        |               |           |               |        |           |      |
| 35-44                  | Cumulative            | 1000                 | 49                                       | 250        | 951                  | 961      | 961           | 39        | 0.84%         | 0.81%  | 0.03%     | 1611 |
|                        | This stage of cascade | 1000                 | 49                                       | 201        | 701                  | 10       |               |           |               |        |           |      |
| 45-54                  | Cumulative            | 1000                 | 69                                       | 401        | 956                  | 965      | 965           | 35        | 0.31%         | 0.30%  | 0.01%     | 1651 |
|                        | This stage of cascade | 1000                 | 69                                       | 332        | 555                  | 9        |               |           |               |        |           |      |
| Marital status         |                       |                      |                                          |            |                      |          |               |           |               |        |           |      |
| Single                 | Cumulative            | 1000                 | 90                                       | 385        | 962                  | 970      | 970           | 30        | 1.61%         | 1.56%  | 0.05%     | 257  |
|                        | This stage of cascade | 1000                 | 90                                       | 295        | 577                  | 8        |               |           |               |        |           |      |
| Married                | Cumulative            | 1000                 | 45                                       | 202        | 974                  | 979      | 979           | 21        | 0.79%         | 0.77%  | 0.02%     | 5333 |
|                        | This stage of cascade | 1000                 | 45                                       | 157        | 772                  | 5        |               |           |               |        |           |      |
| Divorced or separated  | Cumulative            | 1000                 | 88                                       | 246        | 916                  | 933      | 933           | 67        | 0.87%         | 0.81%  | 0.06%     | 376  |
|                        | This stage of cascade | 1000                 | 88                                       | 158        | 670                  | 17       |               |           |               |        |           |      |
| Widowed                | Cumulative            | 1000                 | 79                                       | 401        | 966                  | 973      | 973           | 27        | 0.62%         | 0.60%  | 0.02%     | 661  |
|                        | This stage of cascade | 1000                 | 79                                       | 322        | 565                  | 7        |               |           |               |        |           |      |
| Location               |                       |                      |                                          |            |                      |          |               |           |               |        |           |      |
| Towns                  | Cumulative            | 1000                 | 113                                      | 279        | 979                  | 983      | 983           | 17        | 0.86%         | 0.85%  | 0.01%     | 1412 |
|                        | This stage of cascade | 1000                 | 113                                      | 166        | 700                  | 4        |               |           |               |        |           |      |
| Estates                | Cumulative            | 1000                 | 53                                       | 204        | 956                  | 965      | 965           | 35        | 0.74%         | 0.71%  | 0.03%     | 1267 |
|                        | This stage of cascade | 1000                 | 53                                       | 151        | 752                  | 9        |               |           |               |        |           |      |
| Small villages         | Cumulative            | 1000                 | 27                                       | 212        | 969                  | 975      | 975           | 25        | 0.81%         | 0.79%  | 0.02%     | 3940 |
|                        | This stage of cascade | 1000                 | 27                                       | 185        | 757                  | 6        |               |           |               |        |           |      |
| Casual sexual partners |                       |                      |                                          |            |                      |          |               |           |               |        |           |      |
| ≥1 in last 3 years     | Cumulative            | 1000                 | 53                                       | 188        | 895                  | 916      | 916           | 84        | 2.80%         | 2.56%  | 0.24%     | 234  |
|                        | This stage of cascade | 1000                 | 53                                       | 135        | 707                  | 21       |               |           |               |        |           |      |
| None in last 3 years   | Cumulative            | 1000                 | 53                                       | 223        | 972                  | 978      | 978           | 22        | 0.71%         | 0.70%  | 0.02%     | 5874 |
|                        | This stage of cascade | 1000                 | 53                                       | 170        | 749                  | 6        |               |           |               |        |           |      |

**Table A2j: HIV prevention cascades for HTC and increased condom use for women by population sub-group, Manicaland, Zimbabwe, 2012-2013**
